# Supplementary material for: TADKB: Family classification and a knowledge base of topologically associating domains
Source: PubMed Central journal article supplement (PMC6419456; doi:10.1186/s12864-019-5551-2), 2019-03-14
Supplement: 12864_2019_5551_MOESM1_ESM.pdf [file 12864_2019_5551_MOESM1_ESM.pdf]

# TADKB: Family classification and a knowledge base of topologically associating domains

## Supplementary materials

### Exponent parameter

The exponent parameter of Hi-C contact matrices of TADs is calculated as follows:

(1) calculating the cumulative Hi-C contacts between any two successive bead separations determined by two successive numbers in the set of 2, 3, 4, 6, 9, 14, 22, 35, 56, 91, 149, and 247 (e.g., for the bead separation by 6 and 9, we sum all entries in the Hi-C matrix with indexes  $6 \leq |i - j| < 9$ );

(2) the cumulative Hi-C contacts are normalized by the length of bead separations (e.g., the length between 6 and 9 is 3), and then further normalized by the sum of all length-normalized cumulative Hi-C contacts.

(3) we next calculate the natural logarithm of contact probability and fit a linear model  $\log(y) = ax + b$ , where  $y$  is the contact probability and  $x$  is the bead separation. The parameter  $a$  in  $y = e^{ax+b}$  is the final exponent parameter, which is used to quantify the relationship between genomic distances and the natural logarithms of contact probabilities.

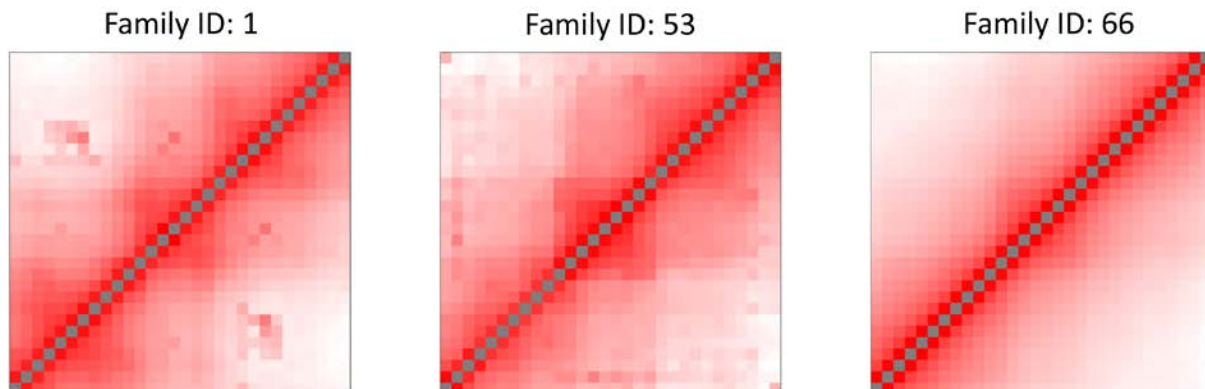

**Figure S1.** The 30x30 average Hi-C contact matrices calculated from all members in a TAD family. The family is from GM12878 with 20 predefined chromatin-state clusters and five predefined structural clusters.

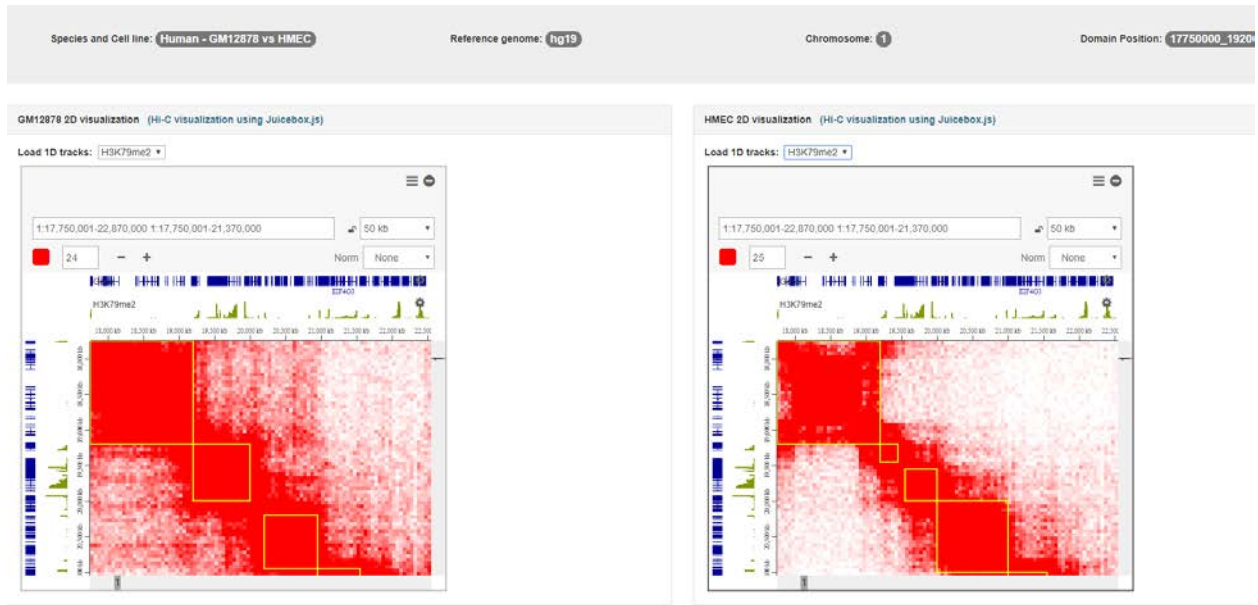

**Figure S2.** An example of two Hi-C heat maps for TAD pairs in acrossCells.

**Table S1.** Number of TADs detected by three different domain-caller methods at the resolutions of 50 kb and 10 kb for Hi-C, HiChIP, and SPRITE data.

|                                     | Cell    | Resolution |      |      |      |      |      | Normalization | Reference            |
|-------------------------------------|---------|------------|------|------|------|------|------|---------------|----------------------|
|                                     |         | 50kb       |      |      | 10kb |      |      |               |                      |
|                                     |         | DI         | GMAP | IS   | DI   | GMAP | IS   |               |                      |
| <b>Human – hg19</b>                 |         |            |      |      |      |      |      |               |                      |
| Hi-C                                | GM12878 | 2773       | 1754 | 3131 | 3775 | 2406 | 3301 | KR            | Rao et al, 2014      |
| HiChIP                              |         | 4988       | 2067 | 3206 | 4296 | 3415 | 4909 | ICE           | Mumbach et al, 2016  |
| SPRITE                              |         | 1789       | 1871 | 3063 | 2729 | 2451 | 4132 |               | Quinodoz et al, 2018 |
| Hi-C                                | HMEC    | 2621       | 1851 | 3154 | 4363 | 3069 | 4854 | KR            | Rao et al, 2014      |
|                                     | HUVEC   | 2508       | 1730 | 3102 | 3438 | 2437 | 4346 |               |                      |
|                                     | IMR90   | 2727       | 1738 | 3039 | 4107 | 2429 | 3684 |               |                      |
|                                     | K562    | 3298       | 1732 | 3097 | 3828 | 2435 | 4149 |               |                      |
|                                     | KBM7    | 2611       | 1755 | 3162 | 3268 | 2374 | 4409 |               |                      |
|                                     | NHEK    | 2734       | 1876 | 3189 | 4213 | 3238 | 5044 |               |                      |
| <b>Mouse – mm10 (CH12-LX – mm9)</b> |         |            |      |      |      |      |      |               |                      |
| Hi-C                                | ES      | 2075       | 1556 | 2812 | 3516 | 2105 | 4224 | KR            | Bonev et al, 2017    |
| HiChIP                              |         | 2228       | 1624 | 2893 | 4061 | 2829 | 4436 | ICE           | Mumbach et al, 2016  |
| SPRITE                              |         | 1626       | 1418 | 2636 | 2064 | 2084 | 3405 |               | Quinodoz et al, 2018 |
| Hi-C                                | NPC     | 1936       | 1522 | 2729 | 2794 | 1740 | 3681 | KR            | Bonev et al, 2017    |
|                                     | CN      | 1930       | 1483 | 2660 | 2716 | 1476 | 3598 |               |                      |
|                                     | CH12-LX | 2290       | 1501 | 2779 | 3204 | 2848 | 4274 |               | Rao et al, 2014      |

**Table S2.** The details of the 15 TADs overlapped with heterochromatins or centromeres.

| Chromosome | TAD start | TAD end   | Structural cluster ID |
|------------|-----------|-----------|-----------------------|
| chr1       | 120800000 | 143550000 | 2                     |
| chr2       | 90400000  | 92350000  | 5                     |
| chr2       | 95300000  | 96500000  | 4                     |
| chr3       | 88250000  | 90550000  | 4                     |
| chr3       | 93500000  | 97450000  | 5                     |
| chr4       | 49450000  | 49700000  | 5                     |
| chr5       | 44800000  | 46450000  | 2                     |
| chr7       | 56200000  | 58100000  | 5                     |
| chr7       | 61500000  | 61950000  | 4                     |
| chr7       | 61950000  | 65100000  | 1                     |
| chr8       | 42250000  | 43850000  | 5                     |
| chr9       | 44700000  | 65650000  | 5                     |
| chr12      | 32900000  | 34900000  | 3                     |
| chr13      | 19000000  | 20200000  | 5                     |
| chr19      | 19650000  | 24650000  | 5                     |

**Table S3.** The TADs are from the overlapping between the second chromatin-state cluster and the third structural cluster in Figure 8. The genes from the following TADs are enriched for GO terms: GO:0044278 ‘cell wall disruption in other organism’, GO:1905874 ‘regulation of postsynaptic density organization’, GO:1905606 ‘regulation of presynapse assembly’, and GO:1905606 ‘regulation of presynapse assembly’ from BPO; GO:0016342 ‘catenin complex’, GO:0099061 ‘integral component of postsynaptic density membrane’, and GO:0005913 ‘cell-cell adherens junction’ from CCO; GO:0005004 ‘GPI-linked ephrin receptor activity’, GO:0005003 ‘ephrin receptor activity’, and GO:0030594 ‘neurotransmitter receptor activity’ from MFO. The overrepresentation test was generated with PANTHER [1].

| Chromosome | TAD start | TAD end   | Exponent parameter | Radius of gyration |
|------------|-----------|-----------|--------------------|--------------------|
| chr1       | 48550000  | 50850000  | -6.93631           | 0.48398            |
| chr1       | 187000000 | 190450000 | -8.85921           | 0.53426            |
| chr1       | 215850000 | 218400000 | -7.12362           | 0.49203            |
| chr1       | 237800000 | 240150000 | -7.37675           | 0.48538            |
| chr2       | 21250000  | 23950000  | -6.94384           | 0.48324            |
| chr2       | 50750000  | 53900000  | -3.25223           | 0.41202            |
| chr2       | 77100000  | 80150000  | -1.51738           | 0.39378            |
| chr2       | 80200000  | 84600000  | -1.96142           | 0.41373            |
| chr2       | 114750000 | 118550000 | -4.65667           | 0.45887            |
| chr2       | 124750000 | 127800000 | -1.86766           | 0.41062            |
| chr2       | 220550000 | 222850000 | -2.55493           | 0.43414            |
| chr3       | 5250000   | 8700000   | -4.72846           | 0.44157            |
| chr3       | 81400000  | 83650000  | -4.5942            | 0.44137            |
| chr3       | 88250000  | 90550000  | -5.22286           | 0.47303            |
| chr3       | 93500000  | 97450000  | -4.61102           | 0.49394            |
| chr3       | 108850000 | 111300000 | -2.90987           | 0.48744            |
| chr3       | 164950000 | 167050000 | -3.19381           | 0.40926            |
| chr4       | 27050000  | 30150000  | -11.05662          | 0.52477            |
| chr4       | 30350000  | 35950000  | -5.93636           | 0.45574            |
| chr4       | 44700000  | 46750000  | -2.01469           | 0.4279             |
| chr4       | 57950000  | 60050000  | -8.87604           | 0.51923            |
| chr4       | 61400000  | 65500000  | -7.14377           | 0.48627            |
| chr4       | 65550000  | 68250000  | -3.34652           | 0.47318            |
| chr4       | 91250000  | 94550000  | -2.90496           | 0.47809            |
| chr4       | 126200000 | 128500000 | -3.35992           | 0.46196            |
| chr4       | 134000000 | 137900000 | -1.14683           | 0.34473            |
| chr4       | 160400000 | 163150000 | -3.24089           | 0.41931            |
| chr4       | 178450000 | 181600000 | -4.73732           | 0.45781            |
| chr5       | 11650000  | 13850000  | -1.29637           | 0.3953             |
| chr5       | 18350000  | 21650000  | -2.50522           | 0.36686            |
| chr5       | 82950000  | 86050000  | -2.01566           | 0.36017            |
| chr5       | 151200000 | 153350000 | -2.22474           | 0.4132             |
| chr6       | 76600000  | 79550000  | -1.13436           | 0.3716             |
| chr6       | 91300000  | 93500000  | -3.30413           | 0.4306             |
| chr7       | 8450000   | 10950000  | -6.27891           | 0.4907             |

|       |           |           |          |         |
|-------|-----------|-----------|----------|---------|
| chr7  | 144050000 | 147950000 | -8.17725 | 0.50605 |
| chr8  | 2700000   | 6050000   | -2.28237 | 0.44967 |
| chr8  | 13550000  | 17000000  | -2.04847 | 0.40004 |
| chr8  | 82850000  | 85500000  | -2.51572 | 0.42533 |
| chr8  | 87600000  | 89700000  | -2.35378 | 0.37675 |
| chr8  | 110750000 | 112900000 | -5.96062 | 0.49936 |
| chr8  | 136400000 | 139150000 | -3.9493  | 0.42628 |
| chr9  | 10000000  | 12500000  | -3.73155 | 0.4202  |
| chr9  | 22500000  | 26650000  | -2.39889 | 0.41225 |
| chr9  | 27600000  | 30800000  | -2.58091 | 0.41496 |
| chr9  | 104350000 | 107500000 | -2.3974  | 0.40584 |
| chr9  | 120350000 | 123200000 | -5.41338 | 0.45139 |
| chr10 | 18950000  | 21150000  | -3.34228 | 0.47263 |
| chr10 | 54350000  | 57050000  | -2.25153 | 0.36162 |
| chr10 | 65600000  | 69400000  | -1.93868 | 0.37268 |
| chr10 | 82950000  | 85850000  | -1.62201 | 0.42062 |
| chr10 | 106150000 | 108300000 | -1.89339 | 0.41646 |
| chr11 | 22900000  | 25900000  | -1.97889 | 0.38827 |
| chr11 | 39050000  | 41250000  | -5.24437 | 0.46486 |
| chr11 | 78300000  | 81250000  | -6.03548 | 0.47228 |
| chr11 | 89900000  | 92650000  | -4.98094 | 0.49102 |
| chr11 | 96200000  | 99650000  | -1.46427 | 0.37762 |
| chr12 | 16100000  | 18200000  | -4.75825 | 0.51068 |
| chr12 | 72350000  | 75000000  | -3.94919 | 0.44155 |
| chr12 | 82750000  | 85000000  | -2.14579 | 0.37669 |
| chr12 | 86350000  | 88400000  | -4.44071 | 0.47628 |
| chr13 | 53750000  | 58050000  | -3.13623 | 0.41614 |
| chr13 | 68000000  | 70050000  | -2.43729 | 0.39751 |
| chr13 | 88450000  | 91700000  | -2.67506 | 0.40955 |
| chr13 | 92800000  | 95050000  | -2.4596  | 0.4327  |
| chr14 | 25650000  | 29100000  | -3.04472 | 0.40551 |
| chr14 | 42250000  | 45350000  | -1.87762 | 0.38821 |
| chr14 | 45800000  | 50050000  | -2.24414 | 0.45679 |
| chr14 | 82000000  | 88200000  | -3.25346 | 0.51409 |
| chr15 | 86400000  | 89000000  | -5.38531 | 0.46539 |
| chr16 | 58800000  | 62200000  | -2.26193 | 0.3823  |
| chr16 | 63350000  | 66400000  | -3.92967 | 0.47642 |
| chr17 | 49350000  | 52950000  | -3.98635 | 0.44388 |
| chr18 | 25200000  | 27350000  | -1.5641  | 0.38968 |
| chr18 | 61650000  | 64550000  | -3.55781 | 0.43204 |
| chr18 | 68200000  | 70300000  | -2.35133 | 0.40206 |
| chr21 | 22350000  | 25900000  | -3.83658 | 0.45603 |
| chrX  | 27550000  | 30550000  | -7.95821 | 0.51303 |
| chrX  | 32350000  | 34400000  | -6.35666 | 0.48998 |
| chrX  | 34550000  | 37200000  | -6.04322 | 0.4904  |
| chrX  | 89100000  | 92700000  | -9.60171 | 0.53167 |

|      |           |           |           |         |
|------|-----------|-----------|-----------|---------|
| chrX | 93100000  | 99700000  | -14.87602 | 0.56056 |
| chrX | 103600000 | 106050000 | -6.44878  | 0.52107 |
| chrX | 115000000 | 117450000 | -7.54204  | 0.46873 |
| chrX | 123500000 | 128550000 | -13.14079 | 0.5467  |
| chrX | 144450000 | 146900000 | -7.4326   | 0.50118 |

**Table S4.** The TADs are from the overlapping between the twelfth chromatin-state cluster and the third structural cluster in Figure 8. The genes from the following TADs are enriched for GO terms: GO:0050911 'detection of chemical stimulus involved in sensory perception of smell', GO:0050907 'detection of chemical stimulus involved in sensory perception', and GO:0007608 'sensory perception of smell' from BPO; GO:0005886 'plasma membrane' and GO:0016021 'integral component of membrane' from CCO; and GO:0005549 'odorant binding', GO:0004984 'olfactory receptor activity', and GO:0004930 'G protein-coupled receptor activity' from MFO. The overrepresentation test was generated with PANTHER [1].

| Chromosome | TAD start | TAD end   | Exponent parameter | Radius of gyration |
|------------|-----------|-----------|--------------------|--------------------|
| chr2       | 122550000 | 124750000 | -4.46825           | 0.47297            |
| chr4       | 49450000  | 49700000  | -4.55697           | 0.44749            |
| chr4       | 96050000  | 99000000  | -9.75547           | 0.49293            |
| chr4       | 187150000 | 191154276 | -1.98385           | 0.40577            |
| chr5       | 24600000  | 26700000  | -1.51476           | 0.36907            |
| chr6       | 61900000  | 64000000  | -2.72338           | 0.46714            |
| chr7       | 51450000  | 54800000  | -1.55849           | 0.39285            |
| chr7       | 61950000  | 65100000  | -2.87523           | 0.46487            |
| chr7       | 66800000  | 68850000  | -3.06734           | 0.38637            |
| chr8       | 33500000  | 36650000  | -2.42188           | 0.40681            |
| chr8       | 50300000  | 52950000  | -5.05449           | 0.45081            |
| chr9       | 66700000  | 67350000  | -1.69291           | 0.41297            |
| chr9       | 82800000  | 85800000  | -2.94915           | 0.40362            |
| chr11      | 36800000  | 38850000  | -3.99009           | 0.4611             |
| chr11      | 48200000  | 50800000  | -1.6366            | 0.41622            |
| chr11      | 54750000  | 57050000  | -2.31918           | 0.45255            |
| chr12      | 60350000  | 62600000  | -4.28048           | 0.46185            |
| chr12      | 125650000 | 128600000 | -6.78419           | 0.48492            |
| chr14      | 39950000  | 42100000  | -1.64776           | 0.41582            |
| chr19      | 27750000  | 29950000  | -2.86113           | 0.40924            |
| chr21      | 19650000  | 22250000  | -2.92476           | 0.43112            |
| chr22      | 47550000  | 50150000  | -1.60596           | 0.39817            |
| chrX       | 61700000  | 64750000  | -7.45827           | 0.50734            |



**Table S5.** The TADs are from the overlapping between the twentieth chromatin-state cluster and the third structural cluster in Figure 8. No enriched GO terms were found in the genes from the following TADs.

| Chromosome | TAD start | TAD end   | Exponent parameter | Radius of gyration |
|------------|-----------|-----------|--------------------|--------------------|
| chr1       | 79250000  | 81600000  | -6.73559           | 0.48322            |
| chr2       | 40000000  | 42050000  | -2.64929           | 0.43344            |
| chr2       | 214100000 | 216200000 | -3.18362           | 0.50573            |
| chr3       | 450000    | 3200000   | -2.19739           | 0.41389            |
| chr3       | 33900000  | 36750000  | -1.90375           | 0.37204            |
| chr3       | 53950000  | 56550000  | -2.11905           | 0.39387            |
| chr3       | 172550000 | 176150000 | -1.65503           | 0.37934            |
| chr4       | 117100000 | 119200000 | -3.8505            | 0.42798            |
| chr4       | 130250000 | 133650000 | -2.37549           | 0.42239            |
| chr5       | 90750000  | 92900000  | -1.99714           | 0.37253            |
| chr6       | 21600000  | 24350000  | -2.25533           | 0.43137            |
| chr6       | 114400000 | 116450000 | -3.88263           | 0.45502            |
| chr7       | 108250000 | 111400000 | -3.70183           | 0.42232            |
| chr7       | 124650000 | 127150000 | -6.1553            | 0.46594            |
| chr8       | 92450000  | 94650000  | -3.11424           | 0.40674            |
| chr10      | 108350000 | 111600000 | -1.52288           | 0.38979            |
| chr12      | 22850000  | 25000000  | -2.19458           | 0.37604            |
| chr13      | 62550000  | 66200000  | -4.16759           | 0.45735            |
| chr13      | 103500000 | 107800000 | -2.49639           | 0.45244            |
| chr20      | 58500000  | 60550000  | -2.78692           | 0.44604            |
| chrX       | 49350000  | 52150000  | -4.84651           | 0.49082            |
| chrX       | 139800000 | 143200000 | -9.48185           | 0.50923            |

1. Mi H, Muruganujan A, Casagrande JT, Thomas PD: **Large-scale gene function analysis with the PANTHER classification system.** *Nature Protocols* 2013, **8**:1551.
